# Supplementary material for: AICAR inhibits NFκB DNA binding independently of AMPK to attenuate LPS-triggered inflammatory responses in human macrophages
Source: Springer Nature journal article supplement (doi:10.1038/s41598-018-26102-3), 2018-05-11
Supplement: MOESM1 [file 41598_2018_26102_MOESM1_ESM.pdf]

**AICAR inhibits NF $\kappa$ B DNA binding independently of AMPK to attenuate LPS-triggered inflammatory responses in human macrophages.**

Johannes Kirchner, Bernhard Brüne, and Dmitry Namgaladze



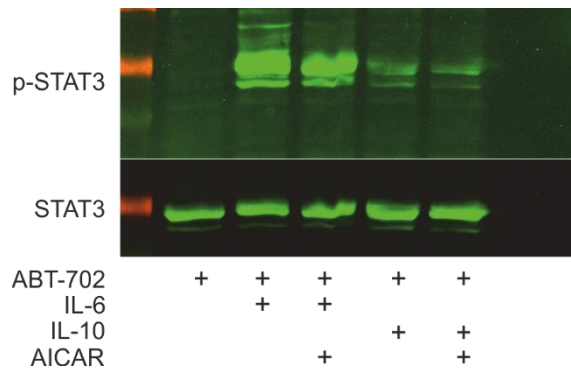

**Supplementary Figure 2.** Full-length scans of the blots presented in Figure 4.

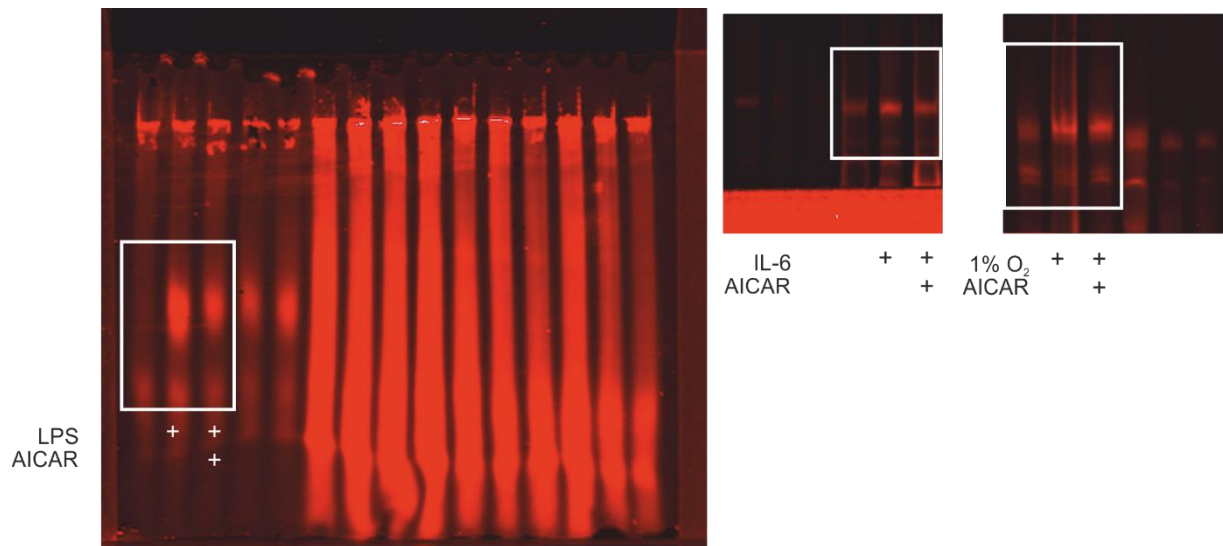

**Supplementary Figure 3.** Full-length scans of the EMSA gels presented in Figure 5.
